# Supplementary material for: Fructose production via extraction-assisted isomerization of glucose catalyzed by phosphates
Source: Royal Society of Chemistry journal article supplement (doi:10.1039/c6gc01712f), 2016-01-01
Supplement: c6gc01712f2.pdf [file c6gc01712f2.pdf]

## Fructose production via extraction-assisted isomerization of glucose catalyzed by phosphates

Irina Delidovich and Regina Palkovits\*

Chair of Heterogeneous Catalysis and Chemical Technology, RWTH Aachen University,  
Worringerweg 2, 52074 Aachen, Germany, E-mail: Palkovits@itmc.rwth-aachen.de

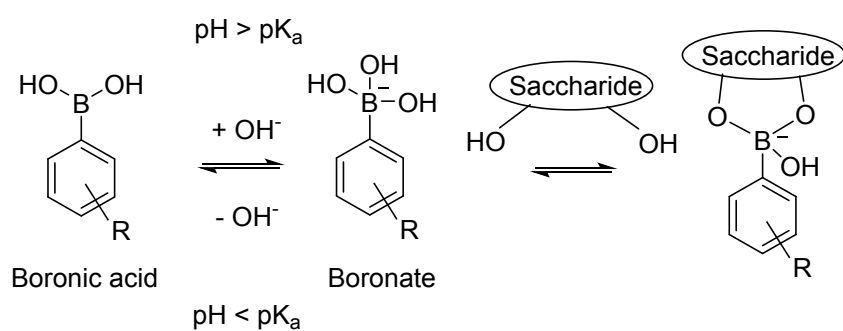

**Scheme 1S.** Interconversion of boronic acids and boronates upon pH changes and complexation of a saccharide with a boronate anion.

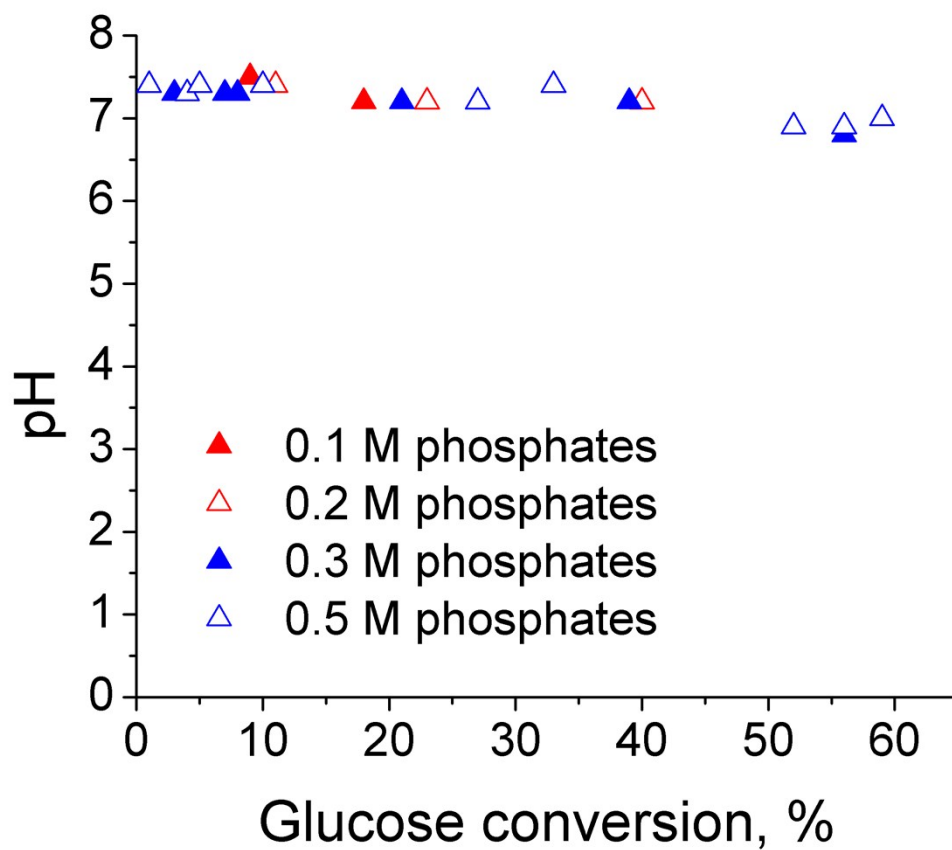

**Figure 1S.** pH of the reaction mixture obtained after isomerization of glucose in the presence of  $\text{NaH}_2\text{PO}_4 + \text{Na}_2\text{HPO}_4$  with  $\text{pH}_0$  7.5 at different concentrations of the catalyst. Reaction conditions: 10wt.% aqueous glucose solution, 110°C, 750 rpm.

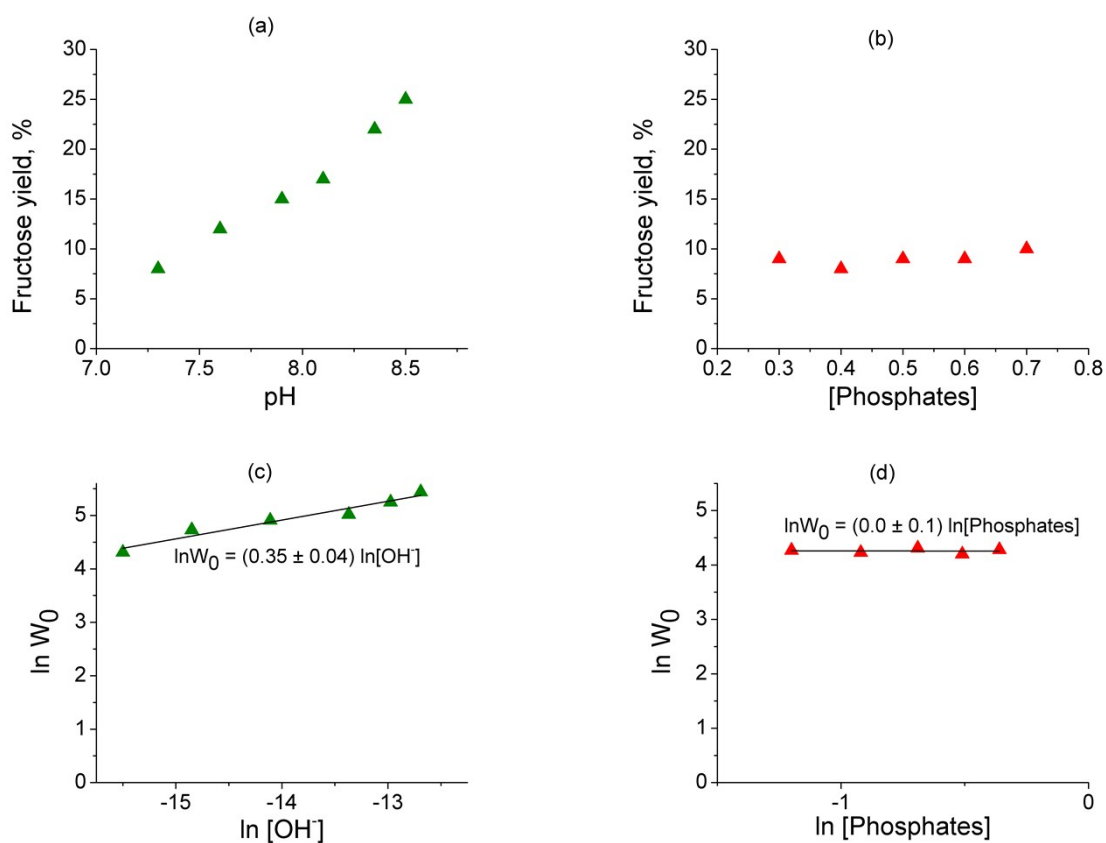

**Figure 2S.** Dependency of fructose yield or initial reaction rate on concentration of OH<sup>-</sup> and phosphates. Reaction conditions: 10wt.% aqueous glucose solution, 110°C, 750 rpm, 20 min. Catalysts for (a) and (c): 0.7M NaH<sub>2</sub>PO<sub>4</sub>+Na<sub>2</sub>HPO<sub>4</sub> with a respective pH<sub>0</sub>. Catalysts for (b) and (d): NaH<sub>2</sub>PO<sub>4</sub>+Na<sub>2</sub>HPO<sub>4</sub> with a corresponding concentration of phosphates and pH<sub>0</sub> 7.5.

According to our results, the isomerization in the presence of  $\text{NaH}_2\text{PO}_4 + \text{Na}_2\text{HPO}_4$  takes place via a proton abstraction leading to formation of an enediol anion. In our opinion, both  $\text{HPO}_4^{2-}$  and  $\text{OH}^-$  can serve as bases at the first step of the mechanism (Scheme 1 in the manuscript). According to  $^{13}\text{C}$  NMR studies of de Wit et al., deprotonation of glucose (step 1) readily occurs in aqueous alkaline solutions, giving  $\text{Glu}^-$  in quasi-equilibrium concentration.<sup>1</sup>

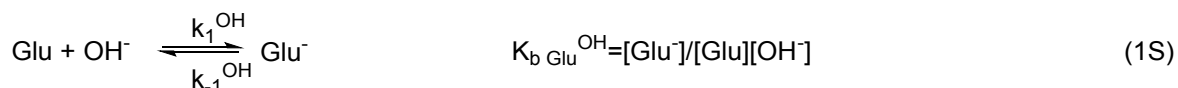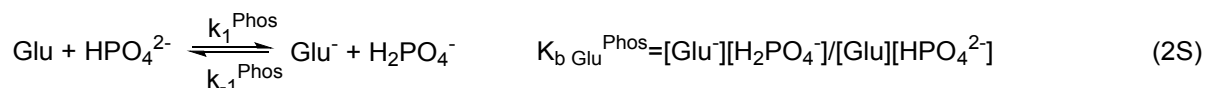

However, it is difficult to reveal real active basic species which are responsible for ionization of glucose molecule since percentage of  $\text{HPO}_4^{2-}$  and  $\text{H}_2\text{PO}_4^-$  species depends on concentration of  $\text{OH}^-$  ions:

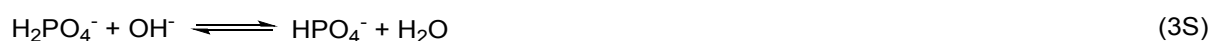

As a result, concentration of  $[\text{Glu}^-]$  can be expressed as

$$[\text{Glu}^-] = K_{\text{b Glu}}^{\text{OH}} [\text{Glu}][\text{OH}^-] \quad (4\text{S})$$

no matter which basic species lead to the ionisation.

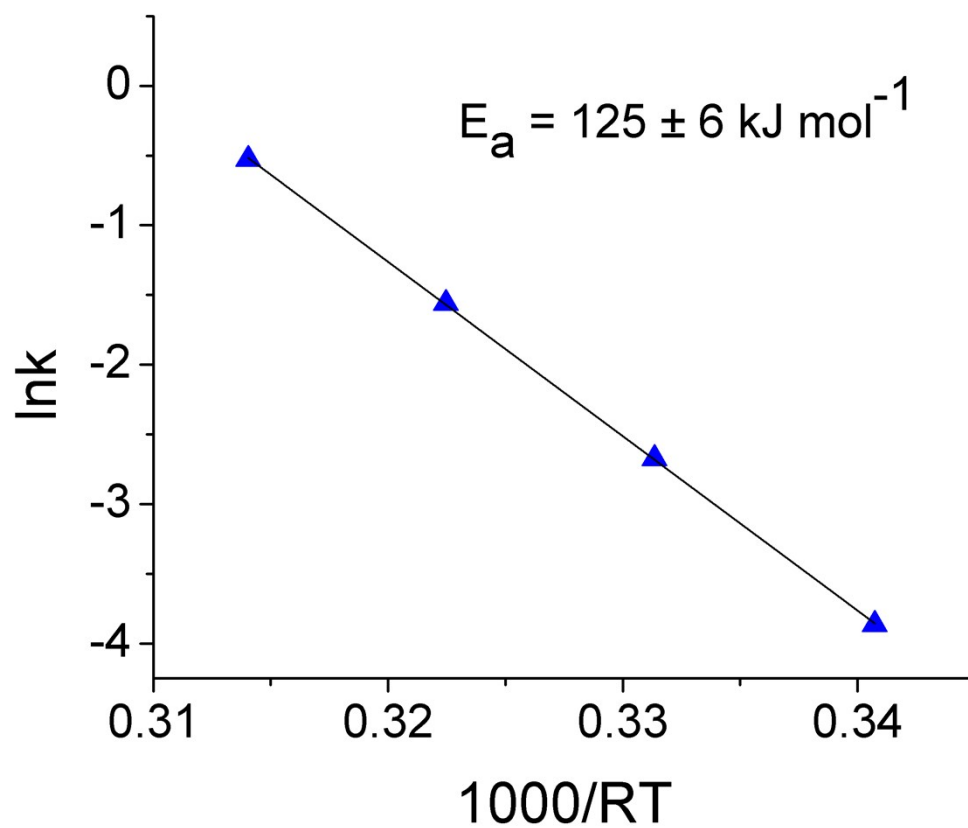

**Figure 3S.** Arrhenius plot for the isomerization. Reaction conditions: 10wt.% aqueous glucose solution, 0.5M  $\text{NaH}_2\text{PO}_4 + \text{Na}_2\text{HPO}_4$ , 80-110°C, 750 rpm.

**Table 1S.** Extraction of fructose and glucose using various boronic acids. Extraction conditions: 4 mL of 0.5M  $\text{NaH}_2\text{PO}_4 + \text{Na}_2\text{HPO}_4$  containing fructose and glucose (aqueous phase); 4 mL of 0.04 M boronic acid, 0.04 M Aliquat® 336, octanol-1, (organic phase), stirring at 750 rpm for 1 h at room temperature.

| Entry | Boronic acid | [Fructose] <sub>0</sub> , wt.% | [Glucose] <sub>0</sub> , wt.% | Extracted fructose, % | Extracted glucose, % | Selectivity for fructose extraction, % |
|-------|--------------|--------------------------------|-------------------------------|-----------------------|----------------------|----------------------------------------|
| 1     | PBA          | 0.3                            | -                             | 10                    | -                    | -                                      |
| 2     | PBA          | 0.3                            | 0.7                           | 9                     | 0                    | 100                                    |
| 3     | HMPBA        | 0.3                            | -                             | 26                    | -                    | -                                      |
| 4     | HMPBA        | 0.3                            | 0.7                           | 25                    | 1                    | 96                                     |
| 5     | NPBA         | 0.3                            | -                             | 1                     | -                    | -                                      |
| 6     | NPBA         | 0.3                            | 0.7                           | 1                     | 0                    | 100                                    |

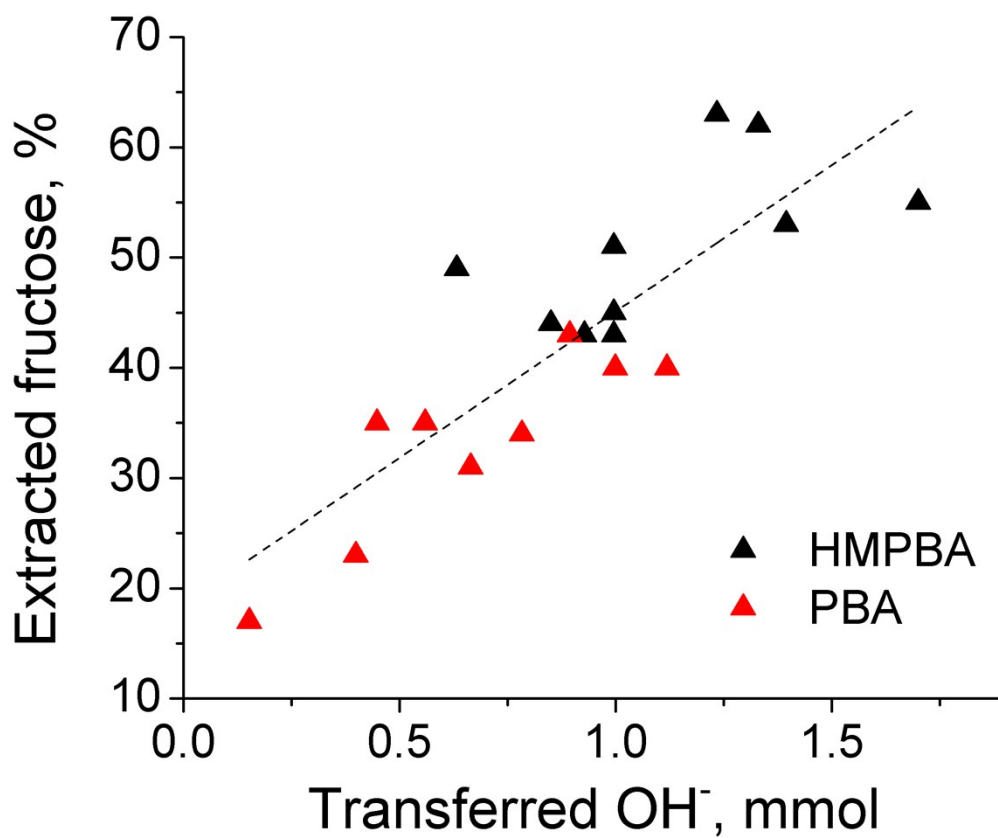

**Figure 4S.** Extraction of fructose depending on amount of OH<sup>-</sup> anions transferred from the aqueous to the organic phase.

**Table 2S.** Recycling of the organic phases for extraction of saccharides. Extraction conditions: 4 mL of 0.5M NaH<sub>2</sub>PO<sub>4</sub>+Na<sub>2</sub>HPO<sub>4</sub> containing fructose and glucose (aqueous phase); 4 mL of 0.4 M boronic acid, 0.4 M Aliquat® 336, octanol-1 (organic phase), stirring at 750 rpm for 1 h at room temperature. Back-extraction conditions: aqueous phase (4 mL of 0.25M H<sub>2</sub>SO<sub>4</sub>) and organic phase (obtained after the 1<sup>st</sup> extraction) were stirred at 750 rpm for 1 h at room temperature. The organic phase after back-extraction was used directly for the 2<sup>nd</sup> extraction without pretreatment of the organic phase.

| Enrtry | Boronic acid | Content of monosaccharides<br>in aqueous phase, mmol |         | 1 <sup>st</sup> extraction               |         | Back-extraction                               |         | 2 <sup>nd</sup> extraction               |         |
|--------|--------------|------------------------------------------------------|---------|------------------------------------------|---------|-----------------------------------------------|---------|------------------------------------------|---------|
|        |              |                                                      |         | Amount of extracted<br>saccharides, mmol |         | Amount of back-extracted<br>saccharides, mmol |         | Amount of extracted<br>saccharides, mmol |         |
|        |              | Fructose                                             | Glucose | Fructose                                 | Glucose | Fructose                                      | Glucose | Fructose                                 | Glucose |
| 1      | HMPBA        | 0.67                                                 | 1.56    | 0.31                                     | 0.09    | 0.25                                          | 0.08    | 0.30                                     | 0.08    |
| 2      | PBA          | 0.67                                                 | 1.56    | 0.21                                     | 0.05    | 0.19                                          | 0.04    | 0.2                                      | 0.02    |



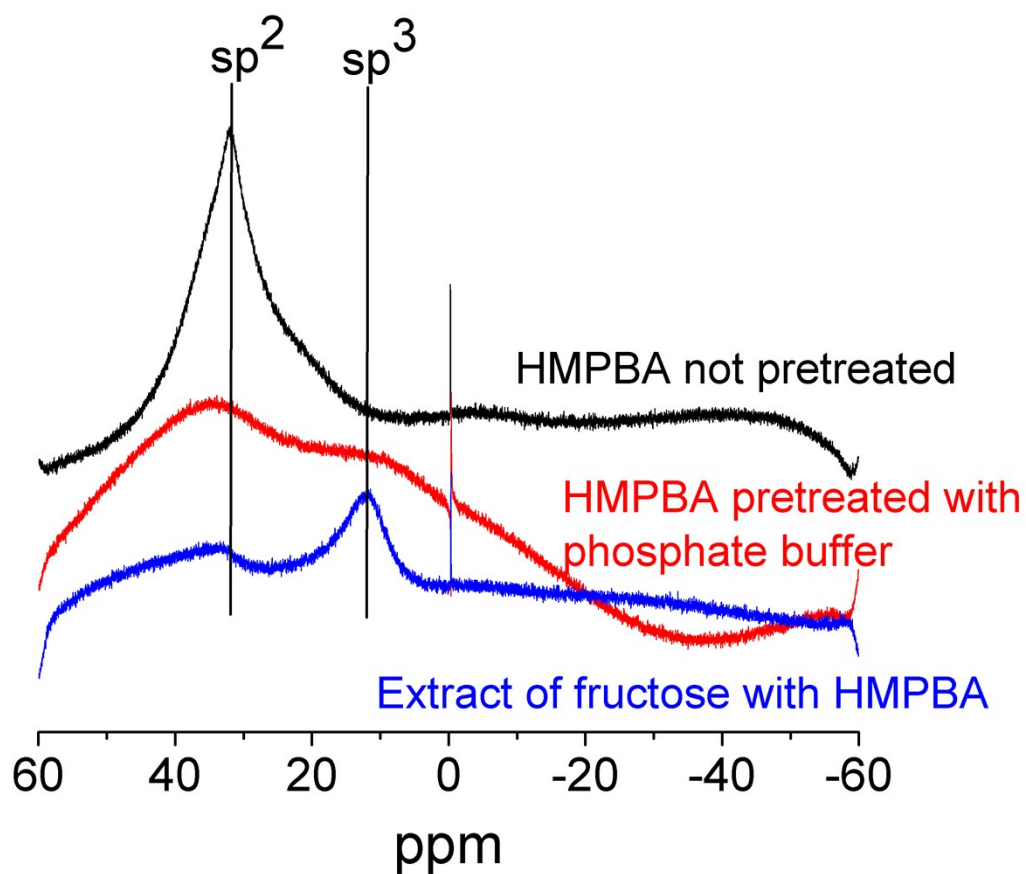

**Figure 5S.**  $^{11}\text{B}$  NMR spectra of HMPBA in  $\text{C}_6\text{D}_6$  before and after pretreatment with phosphate buffer and a spectrum of the organic phase obtained after extraction of fructose with HMPBA.

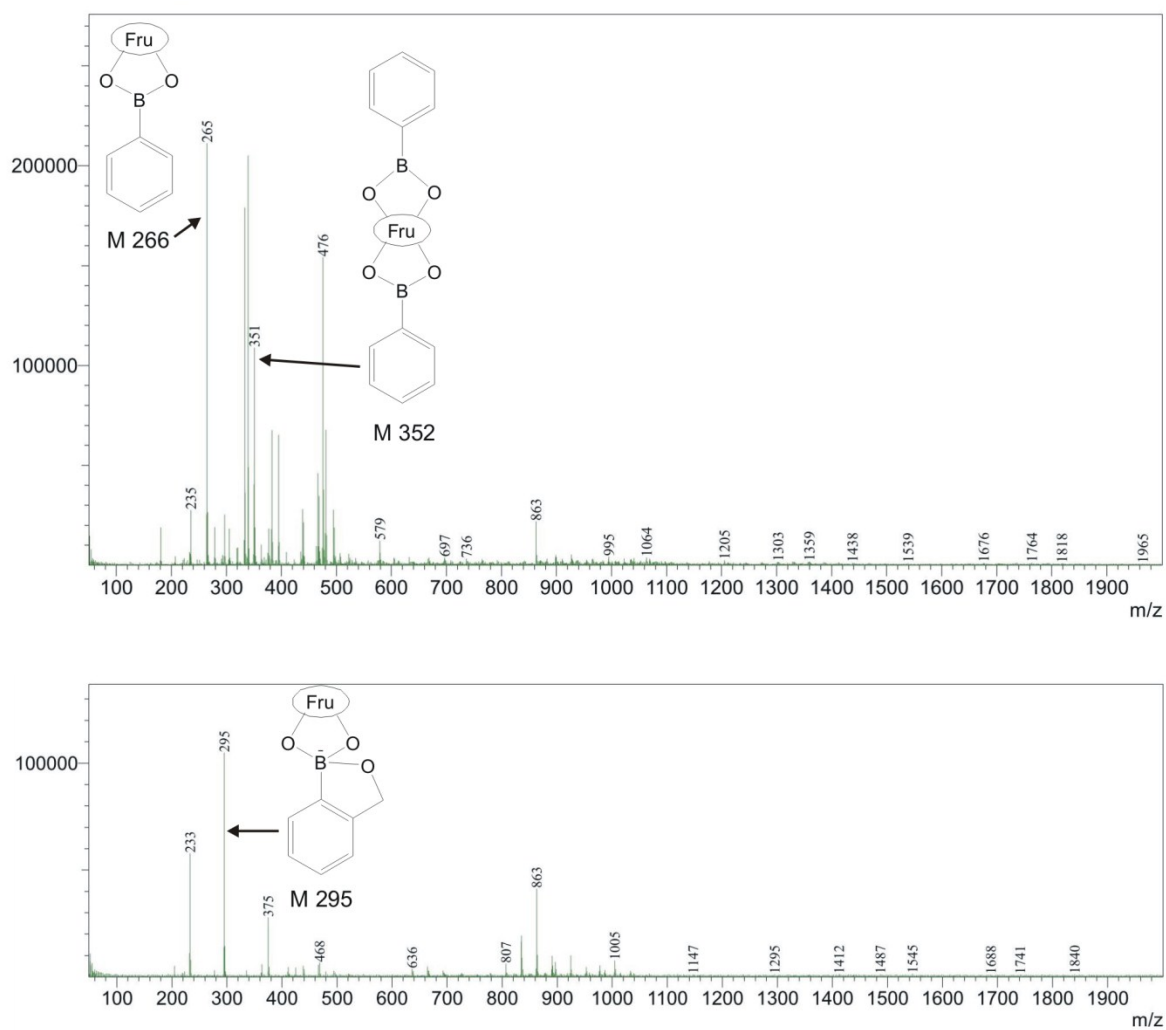

**Figure 6S.** Mass spectra of the organic phases obtained after extraction of fructose with PBA (up) and HMPBA (down).

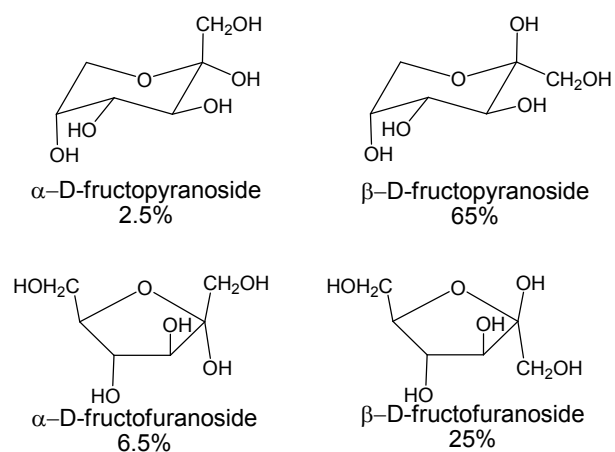

**Figure 7S.** Structures and percentage of cyclic fructosides present in aqueous solution.<sup>2</sup>

**Table 3S.** Percentage of cyclic forms for model disaccharides<sup>2</sup>

| Disaccharide | $\alpha$ P <sup>a</sup> | $\beta$ P <sup>b</sup> | $\alpha$ F <sup>c</sup> | $\beta$ F <sup>d</sup> |
|--------------|-------------------------|------------------------|-------------------------|------------------------|
| Lactulose    | 0                       | 61.5                   | 7.6                     | 29.3                   |
| Palatinose   | 0                       | 0                      | 28.6                    | 71.4                   |
| Sucrose      | 0                       | 0                      | 0                       | 100                    |
| Turanose     | <4                      | 39                     | 20                      | 41                     |

<sup>a</sup>  $\alpha$ P denotes  $\alpha$ -pyranoside

<sup>b</sup>  $\beta$ P denotes  $\beta$ -pyranoside

<sup>c</sup>  $\alpha$ F denotes  $\alpha$ -furanoside

<sup>d</sup>  $\beta$ F denotes  $\beta$ -furanoside

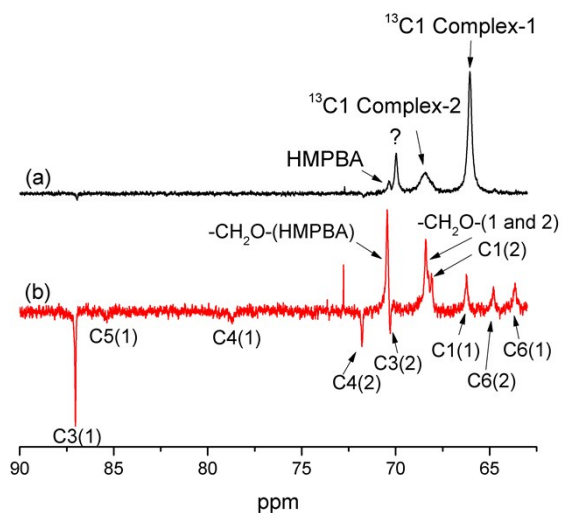

**Figure 8S.**  $^{13}\text{C}$  APT NMR spectra of an organic phase obtained by extraction with HMPBA in  $\text{C}_6\text{D}_6$ ; aqueous phase is a phosphate buffer prepared using  $\text{D}_2\text{O}$  containing (a) D-fructose-1- $^{13}\text{C}$ ; (b) D-fructose; the resonances are provided for Complex-1 (1) and Complex-2 (2).

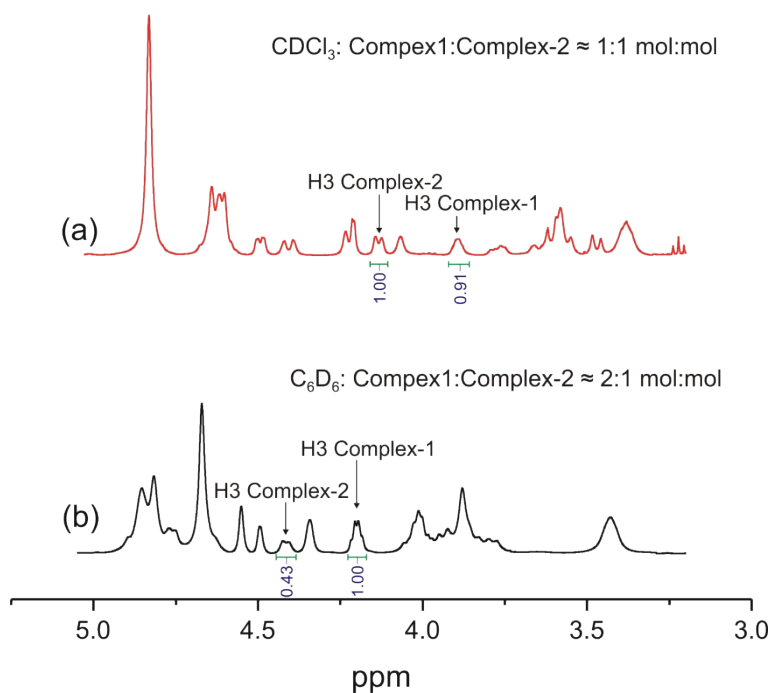

**Figure 9S.**  $^1\text{H}$  NMR spectra of organic phases obtained after extraction of fructose with HMPBA in (a)  $\text{CDCl}_3$ , (b)  $\text{C}_6\text{D}_6$ .

## NMR data

**Aliquat® 336:**  $^1\text{H}$  NMR (400 MHz,  $\text{C}_6\text{D}_6$ )  $\delta$  3.58 (s, 3H, N- $\text{CH}_3$ ), 3.30-3.45 (m, 6H, N- $\text{CH}_2$ -), 1.61 (s, 6H) 1.23-1.43 (m, 38H,  $-(\text{CH}_2)_n\text{-CH}_3$ ), 0.83-1.00 (m, 9H,  $-(\text{CH}_2)_n\text{-CH}_3$ ).  $^1\text{H}$  NMR (400 MHz,  $\text{CDCl}_3$ )  $\delta$  3.10-3.24 (m, 6H, N- $\text{CH}_2$ -), 3.03 (s, 3H, N- $\text{CH}_3$ ), 1.36-1.52 (m, 6H), 0.92-1.20 (s, 38H,  $-(\text{CH}_2)_n\text{-CH}_3$ ), 0.54-0.68 (m, 9H,  $-(\text{CH}_2)_n\text{-CH}_3$ ).  $^{13}\text{C}$  NMR (101 MHz,  $\text{C}_6\text{D}_6$ )  $\delta$  128.1, 127.82, 127.6, 61.9, 60.9, 49.5, 33.7, 32.2, 32.1, 30.1, 30.0, 29.8, 29.73, 29.6, 29.6, 29.5, 26.7, 26.7, 23.0, 23.0, 22.9, 22.5, 14.2, 14.2.  $^{13}\text{C}$  NMR (101 MHz,  $\text{CDCl}_3$ )  $\delta$  77.8, 77.5, 77.2, 62.1, 61.4, 48.8, 32.8, 31.8, 31.7, 31.5, 29.5, 29.3, 29.3, 29.1, 29.1, 29.0, 28.9, 26.2, 25.9, 22.5, 22.5, 22.5, 22.3, 14.0, 13.9.

**HMPBA+Aliquat® 336:**  $^1\text{H}$  NMR (400 MHz,  $\text{C}_6\text{D}_6$ )  $\delta$  8.59 (d, 1H,  $J = 7.19$  Hz) 7.30 (t, 1H,  $J = 7.24$  Hz), 7.22 (t, 1H,  $J = 7.40$  Hz), 7.00 (d, 1H,  $J = 7.52$  Hz), 4.90 (s, 2H), 3.17-3.35 (m, Aliquat® 336), 1.55 (s, Aliquat® 336), 1.13-1.37 (m, Aliquat® 336), 0.82-0.95 (m, Aliquat® 336).  $^1\text{H}$  NMR (400 MHz,  $\text{CDCl}_3$ )  $\delta$  8.10 (d, 1H,  $J = 7.45$  Hz) 7.33-7.41 (m, 1H), 7.20-7.29 (m, 2H), 4.98 (s, 2H), 3.52-3.42 (m, Aliquat® 336), 3.19 (s, Aliquat® 336), 1.56-1.58 (m, Aliquat® 336), 1.08-1.35 (m, Aliquat® 336), 0.74-0.90 (m, Aliquat® 336).  $^{13}\text{C}$  NMR (101 MHz,  $\text{C}_6\text{D}_6$ )  $\delta$  154.0, 132.7, 130.6, 130.3, 127.8, 127.6, 127.020, 120.7, 70.5, 62.2, 61.3, 49.1, 33.3, 32.2, 32.0, 29.9, 29.8, 29.7, 29.5, 29.5, 29.4, 26.5, 26.4, 22.9, 22.4, 14.2.  $^{13}\text{C}$  NMR (101 MHz,  $\text{CDCl}_3$ )  $\delta$  153.0, 131.3, 130.1, 129.8, 126.3, 120.5, 120.1, 77.2, 76.8, 76.5, 70.6, 70.0, 64.6, 61.8, 61.0, 48.3, 32.1, 31.2, 31.0, 28.8, 28.8, 28.6, 28.5, 28.5, 28.4, 25.7, 25.3, 22.0, 21.9, 21.7, 13.5, 13.4.

$^{11}\text{B}$  NMR (96 MHz,  $\text{C}_6\text{D}_6$ , no pretreatment)  $\delta$  32.0.

**Fructose+HMPBA+Aliquat® 336:**  $^1\text{H}$  NMR (400 MHz,  $\text{C}_6\text{D}_6$ )  $\delta$  7.10-7.37 (m), 7.0 (d,  $J = 7.4$  Hz), 4.93-5.18 (m, 5H, Ph- $\text{CH}_2\text{-O-Complex-1}$ , Ph- $\text{CH}_2\text{-O-Complex-2}$ , and H-4-Complex-2), 4.88-4.93 (m, 3H, HMPBA and H $^{\alpha}$ -6-Complex-2), 4.77 (s, 1H, H-5-Complex-1), 4.71 (s, 1H, H-5-Complex-2), 4.63 (d, 1H,  $J = 6.45$  Hz, H-3-Complex-2), 4.56 (s, 1H, H-4-Complex-1), 4.36-4.45 (m, 1H, H-3-Complex-1), 3.91-4.31 (m, 7H, H $^{\alpha,\beta}$ -1-Complex-1, H $^{\alpha,\beta}$ -6-Complex-1, H $^{\beta}$ -6-Complex-2, H $^{\alpha,\beta}$ -1-Complex-2), 3.16 (s, Aliquat® 336), 2.82-3.03 (m, Aliquat® 336), 1.15-1.54 (m, Aliquat® 336), 0.83-1.03 (m, Aliquat® 336).

$^1\text{H}$  NMR (400 MHz,  $\text{CDCl}_3$ )  $\delta$  7.81 (d,  $J = 5.97$ , 4.4H), 7.49-7.56 (m, 0.9H), 7.29-7.43 (m, 2.1H), 7.18-7.28 (m, 5.7 H), 7.05-7.18 (m, 10.6 H), 6.88-6.97 (m, 7.7H), 6.78-6.88 (m, 3.6H), 4.83 (s, 10.5 H, Ph- $\text{CH}_2\text{-O}$  -HMPBA), 4.55-4.72 (m, 7.2 H, Ph- $\text{CH}_2\text{-O}$  – Complexes 1 and 2), 4.49 (dd,  $J = 7.1$ , 2.0 Hz, 1H, H-4-Complex-2), 4.41 (d,  $J = 10.6$ , 1H,  $\text{H}^\alpha$ -6-Complex-2), 4.23 (s, 1H, H-5-Complex-1), 4.21 (d, 1H, H-5-Complex-2), 4.13 (d,  $J = 7.6$ , 1H, H-3-Complex-2), 4.07 (s, 1H, H-4-Complex-1), 3.84-3.92 (m, 1H, H-3-Complex-1), 3.72-3.81 (m, 1H,  $\text{H}^\alpha$ -6-Complex-1), 3.66 (s, 1H,  $\text{H}^\beta$ -6-Complex-1), 3.55-3.61 (m, 4H,  $\text{H}^{\alpha,\beta}$ -1-Complex-1,  $\text{H}^\beta$ -1-Complex-2,  $\text{H}^\alpha$ -6-Complex-2), 3.47 (d,  $J = 10.2$ , 1H,  $\text{H}^\beta$ -1-Complex-2), 3.31-3.43 (m, Aliquat<sup>®</sup> 336), 3.18 (s, Aliquat<sup>®</sup> 336), 2.91-3.06 (m, Aliquat<sup>®</sup> 336), 2.86 (s, Aliquat<sup>®</sup> 336).

$^{13}\text{C}$  NMR (101 MHz,  $\text{C}_6\text{D}_6$ ) 133.0, 130.7, 130.3, 128.2, 127.1, 120.7, 86.9 (C-3-Complex-1), 85.3 (C-5-Complex-1), 78.5 (C-4-Complex-1), 74.4 (C-5-Complex-2), 71.7 (C-4-Complex-2), 70.6 (Ph- $\text{CH}_2\text{-O}$  -HMPBA), 70.0 (C-3-Complex-2), 68.2 (C-1-Complex-2), 68.0 (Ph- $\text{CH}_2\text{-O}$  –Complexes 1 and 2), 65.9 (C-1-Complex-1), 64.7 (C-6-Complex-2), 63.5 (C-6-Complex-1), 62.2, 61.3, 49.3, 33.4, 32.3, 32.1, 30.0, 29.8, 29.6, 29.5, 23.0, 22.5, 14.3, 14.2.

$^{13}\text{C}$  NMR (101 MHz,  $\text{CDCl}_3$ )  $\delta$  131.3, 129.8, 126.4, 125.5, 125.1, 125.5, 120.4, 119.77, 86.4 (C-3-Complex-1), 84.6 (C-5-Complex-1), 77.2, 77.1 (C-4-Complex-1), 73.7 (C-5-Complex-2), 71.0 (C-4-Complex-2), 70.0 (Ph- $\text{CH}_2\text{-O}$  -HMPBA), 69.5 (C-3-Complex-2), 67.5 (Ph- $\text{CH}_2\text{-O}$  –Complexes 1 and 2), 67.1 (C-1-Complex-2), 65.2 (C-1-Complex-1), 63.5 (C-6-Complex-2), 62.3 (C-6-Complex-1), 48.3, 32.2, 31.4, 31.2, 31.1, 29.1, 29.0, 29.0, 28.9, 28.8, 28.7, 28.6, 28.6, 28.5, 25.7, 25.44, 22.2, 22.1, 21.9, 21.7, 13.6, 13.6, 13.5.

$^{11}\text{B}$  NMR (96 MHz,  $\text{C}_6\text{D}_6$ )  $\delta$  33.0, 12.1.

**Table 4S.** Results of extraction-assisted isomerization of glucose into fructose. Reaction conditions of the 1<sup>st</sup> experiment: isomerization over 0.5M NaH<sub>2</sub>PO<sub>4</sub>+Na<sub>2</sub>HPO<sub>4</sub>, 110 °C, 70 min, 750 rpm; extraction was repeated twice at room temperature for 1 h, 750 rpm using 0.4 M HMPBA, 0.4 M Aliquat® 336 in octanol-1 as organic phase, reaction mixture after the isomerization was used as aqueous phase. The conditions of the 2<sup>nd</sup> experiment were like that of the 1<sup>st</sup> experiment, but concentrations of HMPBA were 0.2 and 0.09 M for the first and the second extractions, respectively.

| Run                            | Isomerization                          |                                        |                                          |                                          |                          | Extraction                                |                                           |                     |                     |                                   | Fructose yield, % |
|--------------------------------|----------------------------------------|----------------------------------------|------------------------------------------|------------------------------------------|--------------------------|-------------------------------------------|-------------------------------------------|---------------------|---------------------|-----------------------------------|-------------------|
|                                | [Glu] <sub>0</sub> , <sup>a</sup><br>M | [Fru] <sub>0</sub> , <sup>a</sup><br>M | [Glu] <sub>fin</sub> , <sup>b</sup><br>M | [Fru] <sub>fin</sub> , <sup>b</sup><br>M | Glucose conversion,<br>% | [Glu] <sub>extr</sub> , <sup>c</sup><br>M | [Fru] <sub>extr</sub> , <sup>c</sup><br>M | Extracted Glu,<br>% | Extracted Fru,<br>% | Selectivity for Fru extraction, % |                   |
| The 1 <sup>st</sup> experiment |                                        |                                        |                                          |                                          |                          |                                           |                                           |                     |                     |                                   |                   |
| 1                              | 0.56                                   | 0                                      | 0.47                                     | 0.09                                     | 16                       | 0.4                                       | 0.03                                      | 14                  | 72                  | 50                                | 16                |
| 2                              | 0.5                                    | 0.01                                   | 0.43                                     | 0.08                                     | 24                       | 0.37                                      | 0.02                                      | 13                  | 75                  | 52                                | 24                |
| 3                              | 0.49                                   | 0.01                                   | 0.39                                     | 0.09                                     | 33                       | 0.35                                      | 0.03                                      | 10                  | 69                  | 62                                | 31                |
| 4                              | 0.47                                   | 0.02                                   | 0.38                                     | 0.09                                     | 39                       | 0.34                                      | 0.02                                      | 11                  | 72                  | 60                                | 34                |
| 5                              | 0.46                                   | 0.01                                   | 0.37                                     | 0.10                                     | 43                       | 0.32                                      | 0.03                                      | 15                  | 68                  | 54                                | 39                |
| 6                              | 0.47                                   | 0.02                                   | 0.37                                     | 0.09                                     | 46                       | 0.33                                      | 0.03                                      | 13                  | 70                  | 58                                | 40                |
| 7                              | 0.47                                   | 0.01                                   | 0.39                                     | 0.09                                     | 47                       | 0.34                                      | 0.03                                      | 12                  | 67                  | 55                                | 42                |
| 8                              | 0.49                                   | 0.01                                   | 0.39                                     | 0.09                                     | 49                       | 0.35                                      | 0.03                                      | 10                  | 70                  | 62                                | 43                |
| 9                              | 0.48                                   | 0.01                                   | 0.39                                     | 0.09                                     | 51                       | 0.34                                      | 0.03                                      | 13                  | 68                  | 55                                | 45                |
| The 2 <sup>nd</sup> experiment |                                        |                                        |                                          |                                          |                          |                                           |                                           |                     |                     |                                   |                   |
| 1                              | 0.53                                   | 0                                      | 0.45                                     | 0.08                                     | 15                       | 0.44                                      | 0.04                                      | 4                   | 55                  | 67                                | 15                |
| 2                              | 0.51                                   | 0.02                                   | 0.41                                     | 0.10                                     | 30                       | 0.4                                       | 0.06                                      | 4                   | 44                  | 80                                | 27                |
| 3                              | 0.48                                   | 0.03                                   | 0.43                                     | 0.08                                     | 34                       | 0.38                                      | 0.05                                      | 5                   | 51                  | 60                                | 34                |
| 4                              | 0.48                                   | 0.03                                   | 0.38                                     | 0.12                                     | 42                       | 0.38                                      | 0.07                                      | 2                   | 40                  | 87                                | 41                |
| 5                              | 0.47                                   | 0.04                                   | 0.37                                     | 0.11                                     | 49                       | 0.35                                      | 0.07                                      | 5                   | 39                  | 67                                | 45                |
| 6                              | 0.46                                   | 0.04                                   | 0.38                                     | 0.11                                     | 52                       | 0.36                                      | 0.06                                      | 6                   | 40                  | 71                                | 47                |
| 7                              | 0.49                                   | 0.03                                   | 0.37                                     | 0.11                                     | 57                       | 0.36                                      | 0.07                                      | 4                   | 41                  | 80                                | 49                |
| 8                              | 0.46                                   | 0.04                                   | 0.36                                     | 0.10                                     | 60                       | 0.35                                      | 0.06                                      | 4                   | 41                  | 80                                | 50                |
| 9                              | 0.49                                   | 0.03                                   | 0.38                                     | 0.10                                     | 62                       | 0.38                                      | 0.06                                      | 5                   | 40                  | 86                                | 51                |

<sup>a</sup>[Glu]<sub>0</sub> and [Fru]<sub>0</sub> are concentrations of glucose and fructose in the reaction mixture prior to isomerization

<sup>b</sup>[Glu]<sub>fin</sub> and [Fru]<sub>fin</sub> are concentrations of glucose and fructose in the reaction mixture after isomerization

<sup>c</sup>[Glu]<sub>extr</sub> and [Fru]<sub>extr</sub> are concentrations of glucose and fructose in aqueous phase after extraction

### Calculation of conversion, selectivity, and yield for the reaction-assisted isomerization

Glucose conversion was calculated as follows

$$\text{Glucose conversion} = \frac{\sum_i ([\text{Glu}]_{0,i} - [\text{Glu}]_{\text{fin},i})}{\sum_i ([\text{Glu}]_{0,i} - [\text{Glu}]_{\text{extr},i-1})} \quad (5S)$$

Fructose yield was calculated for the total amount of formed fructose according to the formula:

$$\text{Fructose yield} = \frac{\sum_i ([\text{Fru}]_{\text{fin},i} - [\text{Fru}]_{0,i})}{\sum_i ([\text{Glu}]_{0,i} - [\text{Glu}]_{\text{extr},i-1})} \quad (6S)$$

Used for Equations 5S and 6S parameter  $i$  denotes a number of run, whereas  $[\text{Glu}]_0$ ,  $[\text{Fru}]_0$ ,  $[\text{Glu}]_{\text{fin}}$ ,  $[\text{Fru}]_{\text{fin}}$ ,  $[\text{Glu}]_{\text{extr}}$ , and  $[\text{Fru}]_{\text{extr}}$  denote concentrations of glucose and fructose provided in Table 4S.



## References

- 1 de Wit, G., Kieboom, A. P. G. & van Bekkum, H. Ionization and mutarotation of hexoses in aqueous alkaline solution as studied by  $^{13}\text{C}$ -NMR spectroscopy. *Tetrahedron Lett.* **16**, 3943-3946 (1975).
- 2 Lambert, J. B., Lu, G., Singer, S. R. & Kolb, V. M. Silicate Complexes of Sugars in Aqueous Solution. *J. Am. Chem. Soc.* **126**, 9611-9625 (2004).
